# Supplementary material for: Involvement of cancer-derived EMT cells in the accumulation of 18F-fluorodeoxyglucose in the hypoxic cancer microenvironment
Source: PubMed Central journal article supplement (PMC8126561; doi:10.1038/s41598-021-88414-1), 2021-05-17
Supplement: 41598_2021_88414_MOESM1_ESM.pdf [file 41598_2021_88414_MOESM1_ESM.pdf]

# Involvement of cancer-derived EMT cells in the accumulation of $^{18}\text{F}$ -fluorodeoxyglucose in the hypoxic cancer microenvironment

Sachi Sugita<sup>1,2</sup>, Masanori Yamato<sup>2,3</sup>, Toshimitsu Hatabu<sup>1</sup> and Yosky Kataoka<sup>2,3\*</sup>

<sup>1</sup> Laboratory of Animal Physiology, Graduate School of Environmental and Life Science, Okayama University, Okayama, Okayama 700-8530, Japan.

<sup>2</sup> Laboratory for Cellular Function Imaging, RIKEN Center for Biosystems Dynamics Research, 6-7-3 Minatojima-minamimachi, Chuo-ku, Kobe, Hyogo 650-0047, Japan.

<sup>3</sup> Multi-modal Microstructure Analysis Unit, RIKEN-JEOL Collaboration Center, 6-7-3 Minatojima-minamimachi, Chuo-ku, Kobe, Hyogo 650-0047, Japan.

\*Correspondence should be addressed to: Yosky Kataoka

Laboratory for Cellular Function Imaging, RIKEN Center for Biosystems Dynamics Research, 6-7-3 Minatojima-minamimachi, Chuo-ku, Kobe, Hyogo 650-0047, Japan

E-mail: [kataokay@riken.jp](mailto:kataokay@riken.jp)

TEL: +81-78-304-7115

FAX: +81-78-304-7161

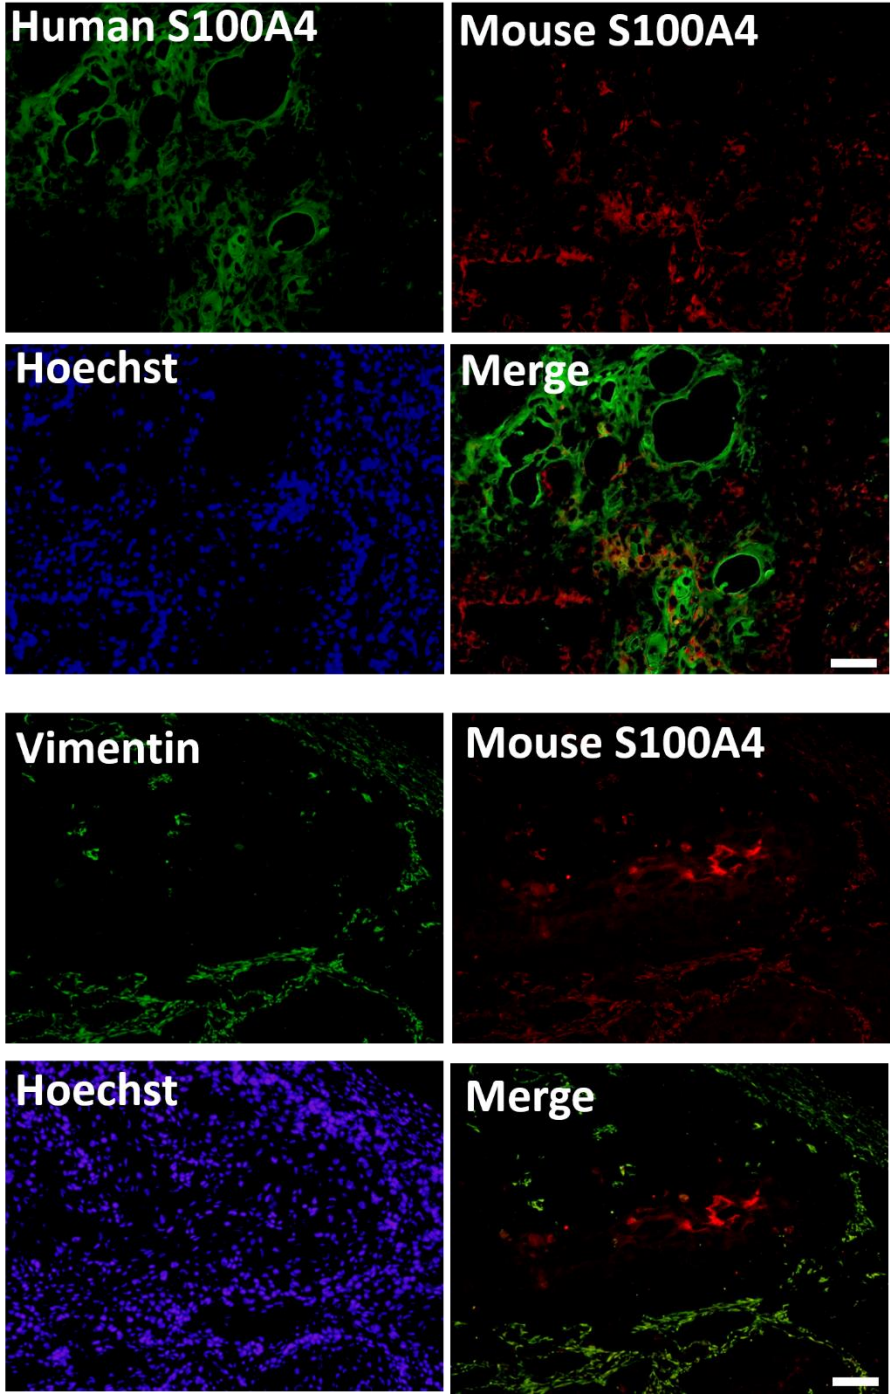

**Supplementary Fig. 1 Human S100A4, Mouse S100A4, and vimentin expression patterns in A431 tumor cells. Bars: 100  $\mu$ m**

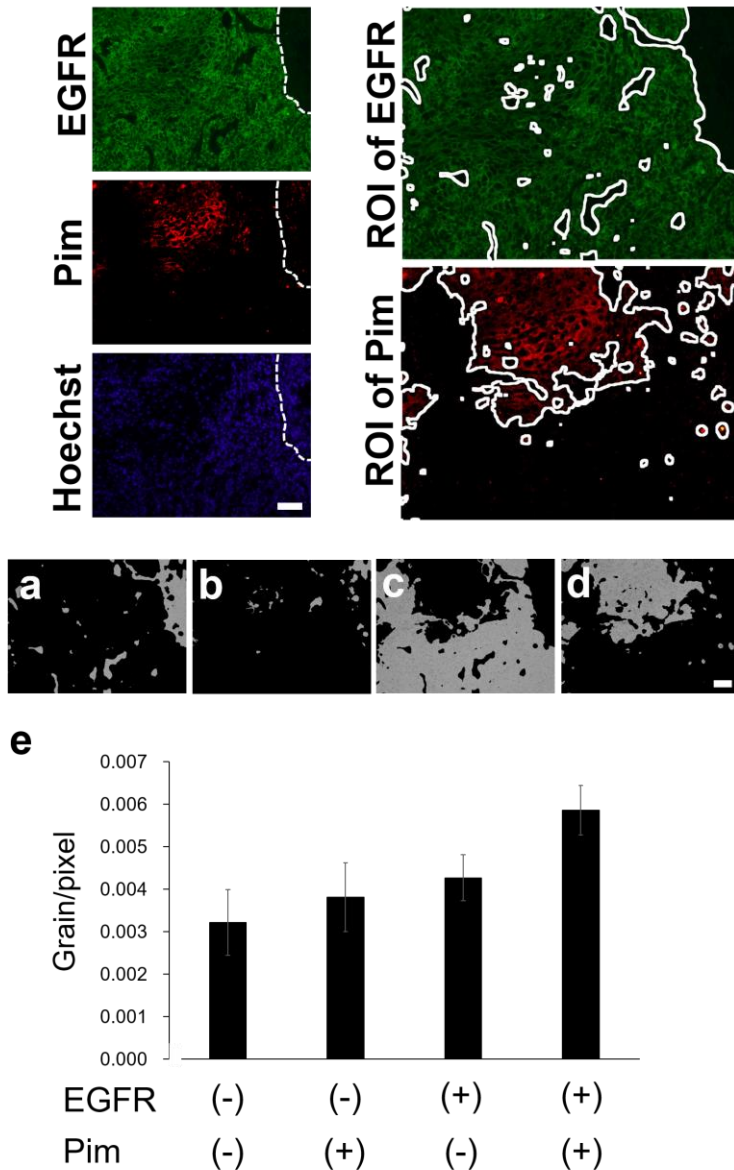

**Supplementary Fig. 2  $^{18}\text{F}$ -FDG accumulation in hypoxic cells expressing EGFR.** The dotted line shows the boundary between the tumor and the skin area. The white line shows the computer determined ROI. a) ROI image showing the pimonidazole- and EGFR-negative area, b) pimonidazole-positive and EGFR-negative area, c) pimonidazole-negative and EGFR-positive area, and d) pimonidazole- and EGFR-positive area. e) Determination of the grain density in the pimonidazole- and EGFR-positive or negative area in each ROI (n = 3, mean  $\pm$  SEM). Pim: Pimonidazole. Bars: 100  $\mu\text{m}$

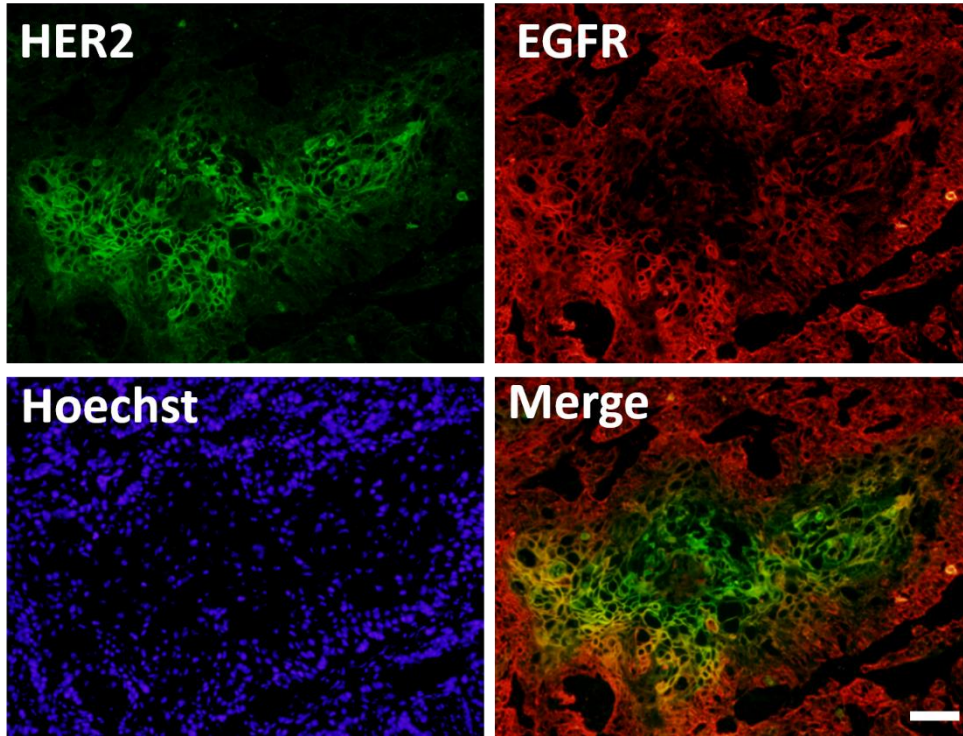

**Supplementary Fig. 3 EGFR and HER2 expression patterns in A431 tumor cells. Bar: 100  $\mu\text{m}$**

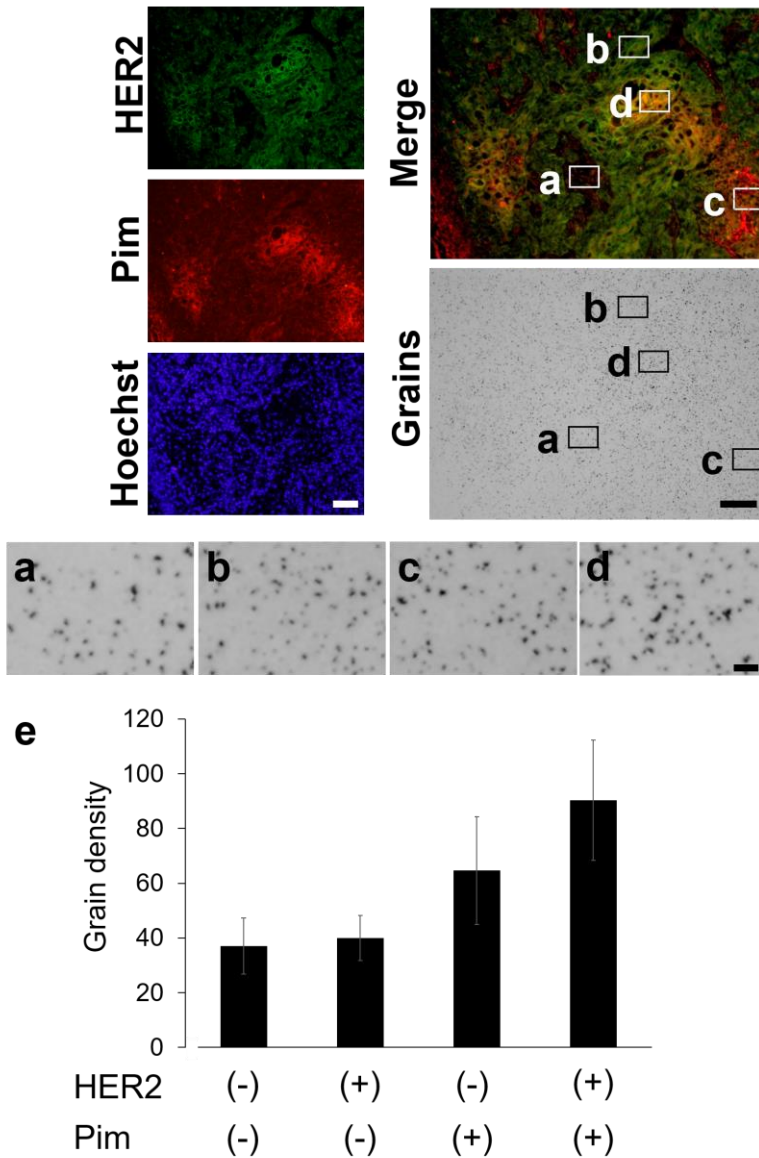

**Supplementary Fig. 4**  $^{18}\text{F}$ -FDG accumulation in hypoxic cells expressing HER2. a)

Magnified view of the micro-autoradiographic image showing the pimonidazole- and HER2-negative area, b) pimonidazole-negative and HER2-positive area, c) pimonidazole-positive and HER2-negative area, and d) pimonidazole- and HER2-positive area. e) Determining the grain density in the pimonidazole- and HER2-positive and negative areas by focusing on ROIs of the same size (n = 3, mean ± SEM). Pim: Pimonidazole. Bars: 100  $\mu\text{m}$  (HER2, Pimonidazole, Hoechst, Merge and Grains), 10  $\mu\text{m}$  (a-d)

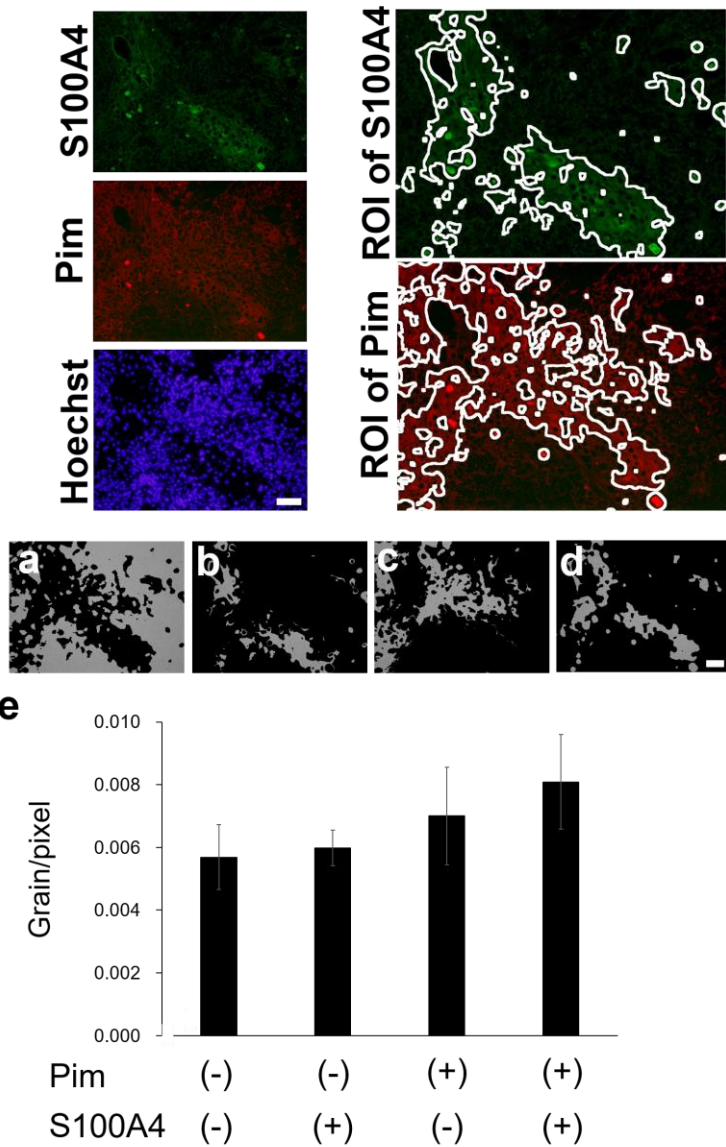

**Supplementary Fig. 5**  $^{18}\text{F}$ -FDG accumulation in hypoxic tumor cells expressing human **S100A4**. The white line shows the computer-determined ROI. a) Merged micro-autoradiography and ROI image showing the pimonidazole- and human S100A4-negative area, b) pimonidazole-negative and human S100A4-positive area, c) pimonidazole-positive and human S100A4-negative area, and d) pimonidazole- and human S100A4-positive area. e) Grain density in the pimonidazole- and human S100A4-positive or negative area in each ROI (n = 3, mean  $\pm$  SEM). Pim: Pimonidazole. Bars: 100  $\mu\text{m}$

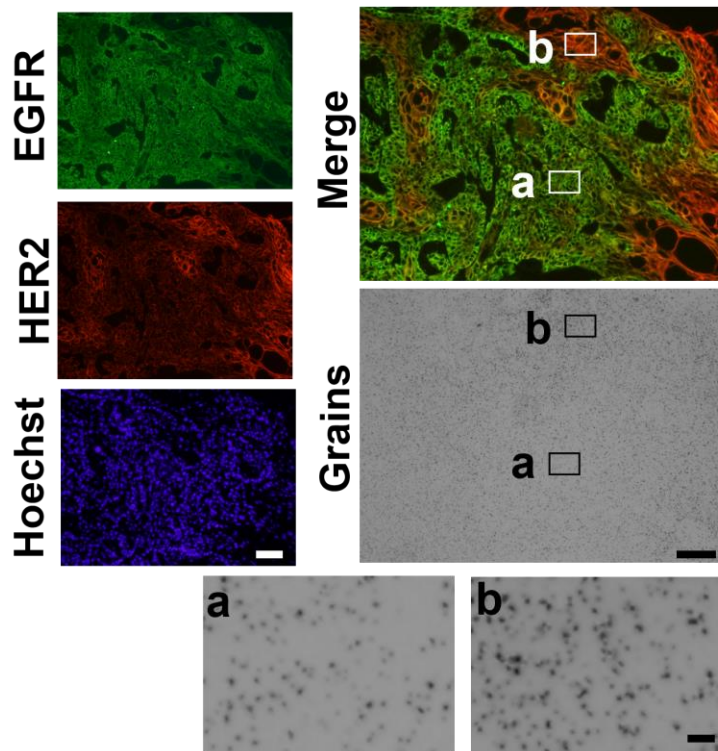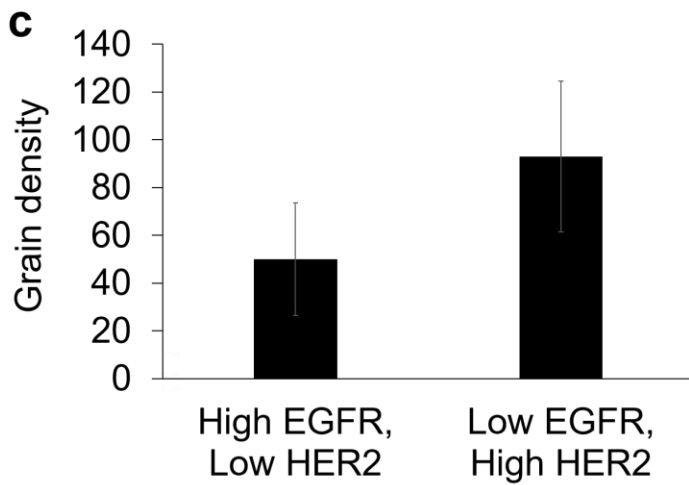

**Supplementary Fig. 6  $^{18}\text{F}$ -FDG accumulation in tumor cells expressing EGFR or HER2.**

The ROI images (a, and b) show the regions with intensively stained EGFR and weakly stained HER2 (high EGFR/low HER2, a) and with weakly stained EGFR and intensively stained HER2 (low EGFR/high HER2, b). c) Grain density in the region with high EGFR/low HER2 or low EGFR/high HER2 (n = 3, mean  $\pm$  SEM). Pim: Pimonidazole. Bars: 100  $\mu\text{m}$ . (EGFR, HER2, Hoechst, Merge and Grains), 10  $\mu\text{m}$  (a, b)

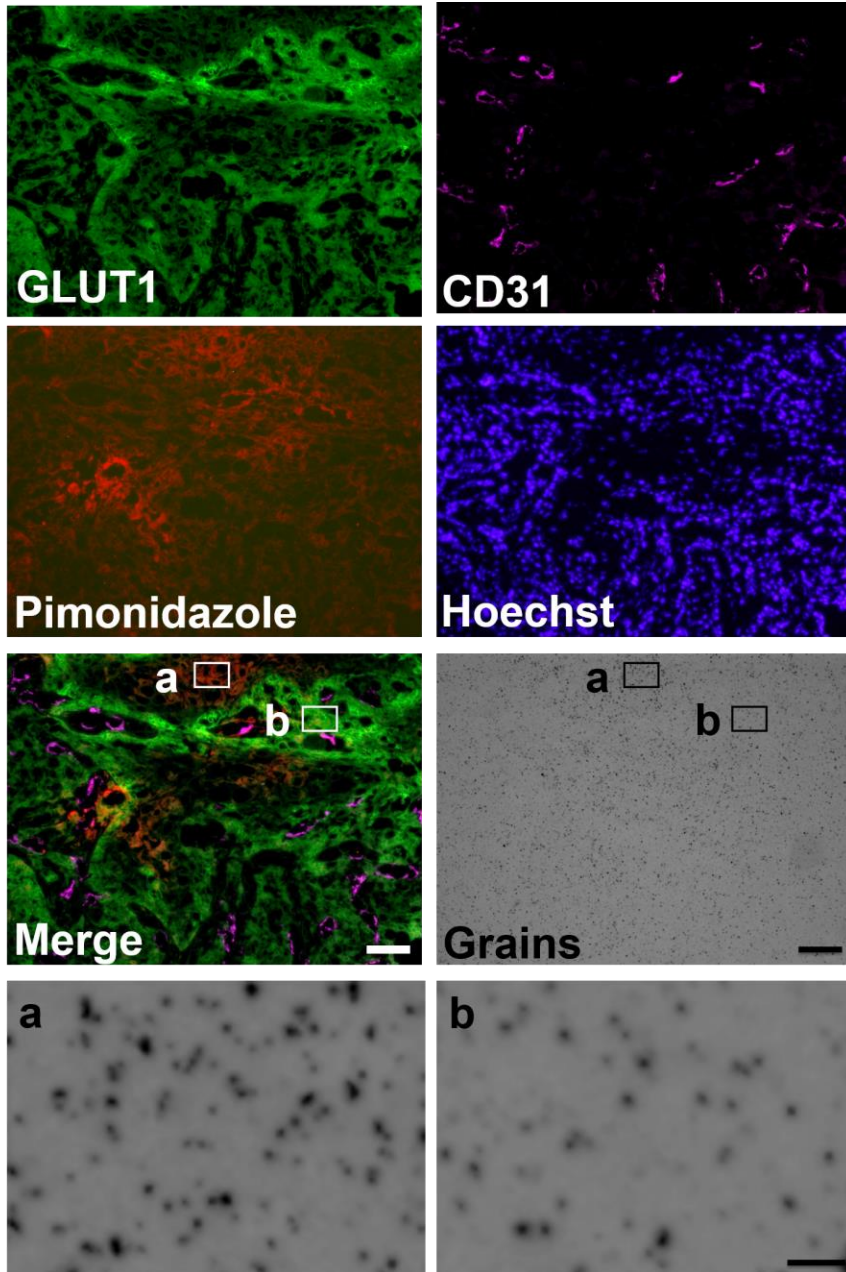

**Supplementary Fig. 7  $^{18}\text{F}$ -FDG accumulation in tumor cells expressing GLUT1 and Pimonidazole.** The ROI images (a, and b) show the regions with intensively stained pimonidazole and weakly stained GLUT1 (a) and with weakly stained pimonidazole and intensively stained GLUT1 (b). Bars: 100  $\mu\text{m}$  (GLUT1, Pimonidazole, CD31, Hoechst, Merge and Grains), 10  $\mu\text{m}$  (a, b)
